1 **Allele imputation for the Killer cell Immunoglobulin-like Receptor KIR3DL1/S1**

2 Genelle F Harrison<sup>1,2+</sup>, Laura Ann Leaton<sup>1,2+</sup>, Erica A Harrison, Marte K Viken<sup>3,4</sup>, Jonathan  
3 Shortt<sup>1</sup>, Christopher R Gignoux<sup>1</sup>, Benedicte A Lie<sup>3,4</sup>, Damjan Vukcevic<sup>5,6</sup>, Stephen Leslie<sup>5,6,7</sup>, and  
4 Paul J Norman<sup>1,2\*</sup>

5 1. Division of Biomedical Informatics and Personalized Medicine, University of Colorado,  
6 Anschutz Medical Campus, Aurora, CO 80045, USA.

7 2. Department of Immunology and Microbiology, University of Colorado, Anschutz Medical  
8 Campus, Aurora, CO 80045, USA.

9 3. Department of Immunology, University of Oslo and Oslo University Hospital, Norway.

10 4. Department of Medical Genetics, University of Oslo and Oslo University Hospital, Norway.

11 5. School of Mathematics and Statistics, University of Melbourne, Parkville, Victoria, Australia

12 6. Melbourne Integrative Genomics, University of Melbourne, Parkville, Victoria, Australia

13 7. School of BioSciences, University of Melbourne, Parkville, Victoria, Australia

14

15 + equal contribution

16 Correspondence: \*Paul Norman: [paul.norman@cuanschutz.edu](mailto:paul.norman@cuanschutz.edu)

17 Keywords: KIR3DL1, KIR3DS1; HLA; imputation; immune-mediated disease

18

19

20

21

22

23

24

25

26

27

28 **Abstract**

29 Highly polymorphic interactions of KIR3DL1 and KIR3DS1 with HLA class I ligands modulates  
30 the effector functions of natural killer (NK) cells and some T cells. This genetically determined  
31 diversity affects severity of infections, immune-mediated diseases, and some cancers, and impacts  
32 the course of cancer treatment, including transplantation. KIR3DL1 is an inhibitory receptor, and  
33 KIR3DS1 is an activating receptor encoded by the *KIR3DL1/S1* gene that has more than 200  
34 diverse and divergent alleles. Determination of *KIR3DL1/S1* genotypes for medical application is  
35 hampered by complex sequence and structural variation that distinguishes individuals and  
36 populations, requiring targeted approaches to generate and analyze high-resolution allele data. To  
37 overcome these obstacles, we developed and optimized a model for imputing *KIR3DL1/S1* alleles  
38 at high-resolution from whole-genome SNP data, and designed to represent a substantial  
39 component of human genetic diversity. We show that our Global model is effective at imputing  
40 *KIR3DL1/S1* alleles with an accuracy ranging from 89% in Africans to 97% in East Asians, with  
41 mean specificity of 99.8% and sensitivity of 99% for named alleles >1% frequency. We used the  
42 established algorithm of the HIBAG program, in a modification named Pulling Out Natural killer  
43 cell Genomics (PONG). Because HIBAG was designed to impute *HLA* alleles also from whole-  
44 genome SNP data, PONG allows combinatorial diversity of *KIR3DL1/S1* and *HLA-A* and *B* to be  
45 analyzed using complementary techniques on a single data source. The use of PONG thus negates  
46 the need for targeted sequencing data in very large-scale association studies where such methods  
47 might not be tractable. All code, imputation models, test data and documentation are available at  
48 <https://github.com/NormanLabUCD/PONG>.

49

## 50 **Author Summary**

51 Natural killer (NK) cells are cytotoxic lymphocytes that identify and kill infected or malignant  
52 cells and guide immune responses. The effector functions of NK cells are modulated through  
53 polymorphic interactions of KIR3DL1/S1 on their surface with the human leukocyte antigens  
54 (HLA) that are found on most other cell types in the body. KIR3DL1/S1 is highly polymorphic  
55 and differentiated across human populations, affecting susceptibility and course of multiple  
56 immune-mediated diseases and their treatments. Genotyping *KIR3DL1/S1* for direct medical  
57 application or research has been encumbered by the complex sequence and structural variation,  
58 which requires targeted approaches and extensive domain expertise to generate and validate high-  
59 resolution allele calls. We therefore developed Pulling Out Natural Killer Cell Genomics (PONG)  
60 to impute *KIR3DL1/S1* alleles from whole genome SNP data, and which we implemented as an  
61 open-source R package. We assessed imputation performance using data from five broad  
62 population groups that represent a substantial portion of human genetic diversity. We can impute  
63 *KIR3DL1/S1* alleles with an accuracy ranging from 89% in Africans and South Asians to 97% in  
64 East Asians. Globally, imputation of *KIR3DL1/S1* alleles having frequency >1% has a mean  
65 sensitivity of 94% and specificity of 99.8%. Thus, the PONG method both enables highly sensitive  
66 individual-level calling and makes large scale medical genetic studies of *KIR3DL1/S1* possible.

67

68

## 69 **Introduction**

70 The *KIR3DL1/S1* gene encodes highly polymorphic receptors that are expressed by natural killer  
71 (NK) cells and some T cells to modulate their effector functions in immunity (1, 2). The receptors  
72 interact with HLA class I ligands that are expressed by most nucleated cells to signify their health  
73 status to the immune system (3, 4). KIR3DL1 allotypes are inhibitory receptors, specific for  
74 subsets of highly polymorphic HLA-A and B (5, 6). The KIR3DS1 allotypes are activating  
75 receptors, specific for non-polymorphic HLA-F and a smaller subset of HLA-A and B (7-9).  
76 Sequence diversity of KIR3DL1/S1 and HLA class I allotypes diversifies human immune  
77 responses to specific infections, cancers, cancer treatment and transplantation (10-19).  
78 Accordingly, this genetically determined diversity also associates with differential susceptibility  
79 and severity for multiple immune-mediated diseases (20-26). Although these factors render it  
80 imperative to genotype *KIR3DL1/S1* allotypes accurately for medical research and applications  
81 that include therapy decisions (27, 28), the high complexity of the genomic region presents  
82 obstacles for standard ascertainment methods (29). The ability to impute alleles from whole-  
83 genome SNP genotype (WG-SNP) data will decrease expense and effort, and greatly increase the  
84 capacity of research or applications where knowledge of KIR3DL1/S1 and HLA class I  
85 combinatorial diversity is critical.

86  
87 The *KIR* locus, on human chromosome 19, is highly divergent in sequence and structure (29). As  
88 defined by the extensively curated ImmunoPolymorphism Database (IPD), *KIR3DL1/S1* has 220  
89 alleles characterized (release 2.10.0: December 2020), with large numbers continuing to be  
90 discovered (30). As observed for polymorphic *HLA*, the *KIR3DL1/S1* alleles both distinguish  
91 individuals and characterize broad ancestral human populations (31, 32). As a likely consequence

92 of selective pressure providing resistance to infectious diseases (33), specific combinations of  
93 KIR3DL1/S1 and HLA associate, differentially across populations, with severity of specific viral  
94 infections or autoimmune diseases (34-41). Likewise, specific combinations of KIR3DL1/S1 with  
95 HLA class I influence cancer susceptibilities non-uniformly across populations (42). In this regard,  
96 two key areas of human health significantly impacted by the population differentiation of  
97 KIR3DL1/S1 and HLA combinatorial diversity are HIV research and treatment, and cancer  
98 therapy (43-46). In particular, specific combinations of KIR3DL1/S1 and HLA allotypes influence  
99 rejection and relapse rates following transplantation (47-50). For these reasons, it is critical to  
100 establish methods for elucidating genetic variation in *KIR3DL1/S1* that can accommodate the full  
101 range of human genetic diversity.

102  
103 KIR3DL1 specifically binds to subsets of HLA-A or B that carry a five amino acid motif, termed  
104 Bw4, on their external facing  $\alpha$ 1-helix (51). Expression of KIR3DL1 gives NK cells the ability to  
105 detect diseased cells that may have lost or altered expression of these HLA class I molecules, and  
106 likely serves as an immune checkpoint inhibitor for functionally mature T cells (52-54). KIR3DL1  
107 polymorphism, and polymorphism both within and outside the Bw4 motif of HLA affects the  
108 specificity and strength of the interaction (55-57). Polymorphism also determines the expression  
109 level or signal transduction abilities of the receptor (58, 59). KIR3DL1/S1 segregates into three  
110 ancient lineages (015, 005 and 3DS1) that have distinct expression and function phenotypes (31).  
111 The 015 lineage comprises inhibitory receptors having high expression and high affinity for  
112 Bw4<sup>+</sup>HLA-B. The 005 lineage are inhibitory receptors having low expression and preferential  
113 affinity for Bw4<sup>+</sup>HLA-A. The 3DS1-lineage are activating receptors specific for HLA-F and some  
114 Bw4<sup>+</sup>HLA-B allotypes expressed by infected cells (60-62). As defined by these phenotypes, the

115 lineages differentially associate with distinct pathological phenotypes (15, 63-65). Exceptions to  
116 these broad rules (e.g. 3DL1\*007 belongs to the 015 lineage but has low expression) contribute to  
117 a hierarchy of receptor allotype strengths and reinforce the need to genotype *KIR3DL1/S1* to high  
118 resolution (66-68).

119  
120 Multiple methods are available to impute *HLA class I* genotypes with high accuracy from WG-  
121 SNP data (69-73). We chose to adapt one of these programs so that *KIR3DL1/S1* and *HLA-A* and  
122 *B* genotypes could be imputed from the same data source, using an identical algorithm. In the  
123 current study we have adapted the HIBAG framework (73) to impute *KIR3DL1/S1* alleles, in a  
124 modification we have named Pulling Out NK cell Genomics (PONG). There are two components  
125 to the process: 1) model building that employs machine-learning to determine which combinations  
126 of SNPs correlate with known alleles, and 2) imputation that uses this model to determine allele  
127 genotypes from study cohorts (73, 74). Construction of the imputation models required high-  
128 resolution *KIR3DL1/S1* alleles and WG-SNP data obtained from the same set of individuals.  
129 PONG thus serves as a complement to PING (Pushing Immunogenetics to the Next Generation),  
130 which can determine *KIR3DL1/S1* alleles from high throughput sequence data (75). With a goal to  
131 create a model representing a substantial component of human genetic diversity, we compiled and  
132 rigorously tested the imputation using data from the 1,000 Genomes populations (76). The R  
133 package PONG is freely available, as are the data sets and imputation models described in this  
134 study.

135

136

## 137 **Materials and Methods**

### 138 *Method Overview*

139 *KIR3DL1/S1* exhibits exceptional sequence polymorphism as well as variation in gene content  
140 (**Figure 1A**). Here, we adapted and optimized the framework of HIBAG (73) to impute  
141 *KIR3DL1/S1* alleles, in a modification we have named Pulling Out NK cell Genomics (PONG).  
142 The development of PONG was focused on building a robust training model that could be used to  
143 impute unknown *KIR3DL1/S1* alleles from WG-SNP data across diverse global populations.  
144 Training an imputation model requires an input of individuals having known *KIR3DL1/S1*  
145 genotypes, coupled with high-density SNP data from the *KIR* region, as typically obtained through  
146 whole-genome SNP analysis (**Figure 1B**). We optimized the process using 1,000 Genomes  
147 individuals, because we had previously determined their *KIR3DL1/S1* alleles (77) and high density  
148 SNP data is available from this cohort (76). We distributed the 1,000 Genomes individuals into  
149 the designated five major population groups (termed ‘superpopulations’ by 1,000 Genomes):  
150 Africa and African-descent (AFR), Americas (AMR), East Asia (EAS), Europe (EUR) and South  
151 Asia (SAS). We first optimized the model building parameters using the EUR group. We randomly  
152 divided each population group into two parts, building an imputation model using the first part and  
153 testing the imputation accuracy with the second part. We then built a global model by combining  
154 all the 1,000 genomes individuals and repeating the process. Finally, we tested the global model  
155 on an independent population having both high-resolution sequence and WG-SNP data.

156

### 157 *Samples and Genomic Data*

158 We obtained high density SNP data for the *KIR* genomic region (chromosome 19: 55247563 –  
159 55361930, Hg19) from the 1,000 Genomes Project Phase 3 individuals (76). The data had been

160 obtained using the Illumina Omni 2.5 platform, which has 4,093 SNPs in the *KIR* genomic region  
161 (76). To determine the *KIR3DL1/S1* alleles present in each individual we used the Pushing  
162 Immunogenetics to the Next Generation (PING) pipeline, as previously described (77). Included  
163 were a subset of 143 individuals from whom Sanger sequences of *KIR3DL1/S1* were obtained (77).  
164 In total, there were 2,083 individuals from the 1,000 Genomes data set from whom we had  
165 independently derived *KIR* sequence and chromosome 19 SNP data available (**Table S1a**), and  
166 these were divided into the designated five major population groups as indicated (**Table S1b**). We  
167 also analyzed SNP data obtained using the Infinium Immunoarray 24v2 (78) from 397 Norwegians  
168 (79), from whom we also determined high resolution *KIR3DL1/S1* genotypes through targeted  
169 sequencing (**Table S2**).

170

#### 171 ***Modifications to HIBAG to Impute KIR3DL1/S1***

172 We modified the HIBAG package version 1.2.4. The package name and relevant C++ functions  
173 were changed from HIBAG to KIRpong to avoid any conflict when both programs are installed.  
174 We removed genome build Hg18 and included Hg19 and Hg38 instead. We maintained many of  
175 the HIBAG functions while adjusting the selected chromosome positions to target the *KIR* gene  
176 cluster on chromosome 19. We modified the ‘hlaBED2Geno’ function to sample chromosome 19  
177 positions 50247563 – 59128983 for Hg19 and 46457117 – 58617616 for Hg38. The ‘hlaLocInfo’  
178 function was updated to target the *KIR* gene cluster and was specified as 55247563 – 55361930  
179 for Hg19 and 54734034 – 54853884 for Hg38. Also in this function, the name of the gene was  
180 changed to *KIR3DL1/S1*. Finally, the printout messages were changed from HIBAG and *HLA* to  
181 PONG and *KIR3DL1/S1* to avoid confusion if both programs are active. The HIBAG functions



182 were maintained, as extensive documentation for these functions is available. The modified  
183 package is available on Github (<https://github.com/NormanLabUCD/PONG>).

184

### 185 ***Optimization and Testing of Model Building***

186 The input data for model building is a text file containing the *KIR3DL1/S1* allele information, and  
187 SNP data in PLINK (80) binary format (.bed, .bim, .fam files) from the same individuals (**Figure**  
188 **1B**). The first column of the text file contains the sample name (Sample.ID), the second column,  
189 *KIR3DL1/S1* allele 1 (Allele1) and the third column, allele 2 (Allele2). We optimized the model  
190 parameters using the 1,000 Genomes European populations group (EUR), comprising 353  
191 individuals from five countries (76) and having 26 distinct *KIR3DL1/S1* alleles (77). We then  
192 expanded model building and testing to include populations from Africa (AFR, 558 individuals,  
193 46 distinct *KIR3DL1/S1* alleles), the Americas (AMR, 298 individuals, 34 *KIR3DL1/S1* alleles),  
194 East Asia (EAS, 406 individuals, 28 *KIR3DL1/S1* alleles) and South Asia (SAS, 467 individuals,  
195 30 *KIR3DL1/S1* alleles). The cohort of 397 individuals from Norway contained 18 distinct  
196 *KIR3DL1/S1* alleles (**Table S2**), 14 of which were also present in the 1,000 Genomes data set.

197

198 We randomly selected 50% of individuals from the EUR group to be used for model building. The  
199 remaining 50% of individuals were used to test the accuracy of the model. We first optimized the  
200 parameters to be used for filtering SNPs prior to model building. We compared the imputation  
201 accuracy of models built after removing SNPs with minor allele counts (MAC) < 2, or < 3, or a  
202 minor allele frequency (MAF) < 1% or < 5%. We also tested the impact of removing individuals  
203 carrying any *KIR3DL1/S1* allele having MAC < 3 in the full EUR group (model + test). Once a  
204 robust model was established for the EUR population, we expanded the model to include all

205 populations using the pre-filtering parameters and procedures established above. Each model was  
206 evaluated based on the time needed for model building as well as the accuracy of imputation.

207

### 208 ***Imputation of KIR3DL1/S1 alleles from ImmunoChip data***

209 To increase SNP density for the Norwegian cohort, we first imputed 1,000 Genomes WG-SNP  
210 data using the Michigan imputation server (81). Although this process produced 2,882 SNPs in the  
211 *KIR* region, it was insufficient to adequately improve accuracy of imputation (53% to 75%; data  
212 not shown). We therefore expanded the target region to chr19: 55,100,000 – 55,500,000 (hg19) to  
213 match that used for the KIR\*IMP program that can be used to impute *KIR* gene content genotypes  
214 (82), and built and tested *KIR3DL1/S1* allele imputation models as described above.

215

### 216 ***Computational Capabilities***

217 All experiments were performed using a server with 512 GB 2400MHz RAM, running Ubuntu  
218 18.04, R 3.5.1, R-server 1.1.456, and using a single core from a 2.3GHz Xeon E5-2697 CPU.

219

### 220 ***Evaluation of imputation models***

221 Overall accuracy of a given imputation model was determined as the number of correct allele calls  
222 made per individual (0, 1 or 2) divided by 2N. Sensitivity and specificity of a given model were  
223 determined per *KIR3DL1/S1* allele. Sensitivity was measured as the percentage of individuals  
224 known to be positive for a given allele who were also called positive for that allele by imputation.  
225 Specificity was determined as the percentage of individuals known to be negative for a given allele  
226 that were also called as negative for that allele by imputation.

## 227 **Results**

### 228 *Parameters for frequency filtering of SNP and allele data*

229 We designed, tested and optimized a model to impute *KIR3DL1/SI* alleles from WG-SNP data  
230 using a modification to the HIBAG framework and algorithm (73). We used SNP data from the  
231 1,000 Genomes project (76) and *KIR3DL1/SI* genotypes that we had previously determined from  
232 sequence data from the same individuals (77). We focused first on the EUR group, comprised of  
233 353 individuals and having 26 distinct *KIR3DL1/SI* allele sequences, ranging from 0.14% to 20%  
234 allele frequency (**Figure 2A**). We randomly selected 50% of the EUR individuals to be used for  
235 model building and used the other 50% to test the accuracy of the model. With the goal of  
236 maximizing the imputation accuracy of the test dataset, while preserving computational efficiency  
237 in model building, we first determined the effect of removing low-frequency SNPs. We measured  
238 the imputation accuracy of models that were built following removal of SNPs having a minor allele  
239 count (MAC) of  $< 2$  (1,286 SNPs remaining in the *KIR* region) or MAC  $< 3$  (1,044 SNPs remaining  
240 in the *KIR* region) in the full set of 353 individuals. We also measured the accuracy following  
241 removal of SNPs with a minor allele frequency (MAF)  $< 1\%$  (941 SNPs remaining in the *KIR*  
242 region) or  $< 5\%$  (645 SNPs remaining in the *KIR* region) in the full set of 353 individuals. A model  
243 was also built with no filtering of the genotype data for comparison (4,089 SNPs in *KIR* region).  
244 The *KIR* region SNPs used for testing the model accuracy were not filtered, and the models took  
245 from 6-9 seconds to impute *KIR3DL1/SI* alleles from the test data set of 177 individuals.

246

247 For the purposes of this test, accuracy was determined from the number of correct allele calls per  
248 individual in the test set. The lowest imputation accuracy was obtained using a MAF  $< 5\%$ , with  
249 91% of *KIR3DL1/SI* alleles called correctly, whereas models built with all other filtering

250 parameters imputed the alleles with 92% accuracy (**Figure 2B, Table S3**). Thus, imputation  
251 accuracy was similar across all SNP frequency filtering parameters tested (**Figure 2B**). The model  
252 building run time ranged from 29 minutes, when SNPs were filtered at  $MAF < 5\%$ , to 84 minutes  
253 when no filtering was used. We selected  $MAC < 3$  as this was the fastest build time (66 minutes)  
254 for models of 92% accuracy (**Figure 2B**). Of the 26 *KIR3DL1/SI* alleles observed in the full EUR  
255 group ( $N=353$ ), twelve were observed less than three times (**Figure 2A**). Following removal of  
256 individuals possessing at least one of these twelve infrequent alleles, 14 *KIR3DL1/SI* alleles and  
257 339 individuals remained in the population. As above, we removed SNPs having  $MAC < 3$ , divided  
258 this population in half, built a model and tested it on the other half. Compared with using  $MAC <$   
259  $3$  alone, the time required to build this model decreased from 66 minutes to 44 minutes, and the  
260 time to run the model reduced to 5 seconds (165 individuals), whereas the imputation accuracy  
261 increased from 92% to 96% (**Figure 2B**). Thus, this combination of filtering parameters produced  
262 the fastest time for model building and running, with the highest accuracy for imputing  
263 *KIR3DL1/SI* alleles. We therefore implemented these parameters in all subsequent analyses.

264  
265 We next evaluated the sensitivity and specificity of the final EUR imputation model, as described  
266 in Methods. Of 14 alleles in the model data set, 13 were also present in the test set (**Figure 2C**).  
267 We observed a modal specificity of 100%, and a mean of 99%. The two alleles having 98%  
268 specificity were *KIR3DL1\*00101* and *KIR3DSI\*01301*, thus for every 100 individuals imputed to  
269 have either allele, two were not shown as present through sequencing. We observed similarly high  
270 modal sensitivity of 100%, with a mean of 77%. All alleles with a frequency in the EUR group  
271 greater than 1.6% were imputed with  $>99\%$  sensitivity. Below 1.6% allele frequency, two alleles  
272 (*3DL1\*00402* and *3DSI\*049N*) were imputed with 50% sensitivity and two (*KIR3DL1/SI* neg,

273 and *3DL1\*009*) with 0% sensitivity. *KIR3DL1\*00402* and *3DSI\*049N* are each distinguished  
274 from their closest (parental) alleles by a single or a doublet nucleotide substitution, respectively  
275 (30). Accordingly, in each case these alleles were imputed as the parental allele (not shown).  
276 *KIR3DL1\*009* represents a double recombination having exons 2-3 identical to *3DSI\*01301* and  
277 exons 1 and 4-9 identical to *3DL1\*001* (83, 84). The haplotype that lacks *KIR3DL1/SI* represents  
278 a large-scale deletion encompassing up to seven *KIR* genes (**Figure 1A**), and likely has very few  
279 identifying SNPs within the *KIR* locus. Thus, we observe a clear relationship between *KIR3DL1/SI*  
280 allele frequency and accuracy of imputation, with all high-frequency alleles being imputed with  
281 high accuracy, and those imputed with lower accuracy attributed both to their low frequency and  
282 lack of additional identifying characteristics.

283

#### 284 ***Development of a trained Global model for KIR3DL1/SI imputation***

285 After establishing the most robust filtering parameters for model building in the EUR population  
286 group, we expanded the analysis to the four other major population groups from the 1,000  
287 Genomes project (Africa - AFR, Americas - AMR, East Asia - EAS and South Asia - SAS). We  
288 also combined all five population groups to form an additional ‘Global’ group (**Table 1**). As above,  
289 *KIR* locus SNPs and *KIR3DL1/SI* alleles having  $MAC < 3$  in each respective group were removed,  
290 imputation models were then built using 50% individuals, and tested on the remaining 50%.  
291 Following the filtering based on *KIR3DL1/SI* allele counts, the African population group had the  
292 highest diversity with 31 alleles and the East Asian group the lowest with 13 alleles (**Figure 3A**).  
293 A total of 90 distinct *KIR3DL1/SI* alleles were present in the Global group, 42 of these occurred  
294 more than twice in total and were therefore included in model building. This allele filtering process  
295 resulted in 58 of the 2,082 individuals being removed. The Global model included 1,017

296 individuals and took 10 weeks to build. This process also increased the number of target alleles  
297 within all the individual population groups (**Figure 3A**).

298

299

**Table 1. Number of *KIR3DL1/S1* alleles and individuals in data sets.**

| 1000 Genomes<br>Population<br>Group | Number of Individuals in Data Set |                                        |                 |             |
|-------------------------------------|-----------------------------------|----------------------------------------|-----------------|-------------|
|                                     | All                               | Global<br><i>KIR3DL1/S1</i><br>MAC < 3 | In Model<br>Set | In Test Set |
| Africa (AFR)                        | 558                               | 541                                    | 272             | 269         |
| Americas<br>(AMR)                   | 298                               | 292                                    | 146             | 146         |
| East Asia<br>(EAS)                  | 406                               | 389                                    | 196             | 193         |
| Europe (EUR)                        | 353                               | 345                                    | 174             | 171         |
| South Asia<br>(SAS)                 | 467                               | 457                                    | 229             | 228         |
| Global                              | 2,082                             | 2,024                                  | 1,017           | 1,007       |

300

301

302 In testing models built within each respective population group, imputation accuracy ranged from  
303 87.8% in the SAS group to 96.6% in EAS group (**Figure 3B** and **Table S3**). When using the Global  
304 model, however, imputation accuracy increased for all groups, ranging from 89.0% in SAS and to  
305 97.2% in EAS (**Figure 3B**). When the test group was comprised of individuals drawn from all five  
306 of the population groups, an accuracy of 92.3% was achieved. This latter finding gives an estimate  
307 of the accuracy of *KIR3DL1/S1* allele imputation for individuals of unknown genetic ancestry.  
308 Using the Global model, the imputation time ranged from 2 min 9 s for AMR (N=146) to 4 min 5  
309 s for SAS (N=228), and it took 16 min 1 s to impute the Global test set of 1,007 individuals (**Table**  
310 **S3**).

311

312 We next evaluated the specificity and sensitivity of the Global imputation model. The mean  
313 specificity across the 42 alleles was 99.8%, with 40 of them having a specificity above 99%  
314 (**Figure 3C**). The lowest specificities were observed for *3DSI\*01301* at 96% and *3DL1\*01502* at  
315 98.5%. Of the individuals falsely imputed as having *3DSI\*01301*, 84% were due to a *KIR3DL1/Sl*  
316 deletion haplotype. This finding is consistent with the suggestion that the parental haplotype for  
317 the deletion carried *3DSI\*01301* (84). The individuals falsely imputed as having *3DL1\*01502*,  
318 possessed either *3DL1\*01702*, *\*051* or *\*025* (33% each). All these alleles fall into the same  
319 ancestral lineage as *3DL1\*015*, and likely exhibit similar phenotypes of high expression and ligand  
320 binding (1). In the final Global population group (2N = 4,068) there were 15 *KIR3DL1/Sl* alleles  
321 with a frequency above 1% and 27 alleles with a frequency below 1% (**Figure 3C**). For those  
322 *KIR3DL1/Sl* alleles having allele frequency below 1%, we observed a modal sensitivity of 0%,  
323 and a mean of 29%. Conversely, *KIR3DL1/Sl* alleles with a frequency above 1% had a modal  
324 sensitivity of 100% and a mean of 94%. The sensitivity rose to 99% when the allele representing  
325 the absence of *KIR3DL1/Sl* was excluded. Despite a frequency of less than 1% the alleles *\*006*,  
326 *\*092*, *\*035* and *\*089* were imputed with 100% sensitivity (**Figure 3C**).

327  
328 In total 27 *KIR3DL1/Sl* alleles had a frequency less than 1% in the Global population. When the  
329 global frequency was above 1%, PONG was able to impute the alleles 91 to 100% of the time  
330 (**Figure 3D**). Thus, similar to the model built using the European population group, low frequency  
331 alleles were more likely to be incorrectly imputed than high frequency alleles. An exception to this  
332 was the allele representing the absence of *KIR3DL1/Sl* (*\*00000*) in which the frequency was 4%  
333 but PONG was only able to impute the absent allele correctly 35% of the time. Together this shows  
334 that PONG is effective for imputing common *KIR3DL1/Sl* alleles and some rare alleles across a

335 diverse set of human populations. Consistent with their overall lower accuracy, the African and  
336 South Asian population groups had the highest number of *KIR3DL1/S1* alleles with a frequency  
337 less than 1% (17 and 9, respectively). By contrast, only three low frequency alleles were present  
338 in the East Asian population. In summary, the accuracy of PONG is affected by the frequency of  
339 *KIR3DL1/S1* alleles and is therefore less effective in more diverse human populations given a  
340 similar-sized training sample.

341

#### 342 ***Testing the Global model using less dense genotyping datasets.***

343 We analyzed a cohort of 397 individuals from Norway, from whom we generated Infinium  
344 Immunoarray SNP and high-resolution *KIR3DL1/S1* allele sequence data. For this test, we  
345 extended the window in which classifiers are sampled to match that of the KIR\*IMP program  
346 (chr19: 55,100,000 – 55,500,000: hg19), which contains 294 SNPs on this chip. We observed a  
347 strong correlation between allele frequencies in Norway and the 1,000 Genomes EUR group ( $r =$   
348 0.96). In total, 18 *KIR3DL1/S1* alleles were identified in the Norwegian cohort through nucleotide  
349 sequencing, including one rare allele (*3DL1\*044*: 0.02%) that is absent from the 1,000 Genomes  
350 Global population. After filtering for  $MAC < 3$ , there were 13 *KIR3DL1/S1* alleles present. In  
351 testing the model built using 50% of the Norwegian cohort against the other 50% of the cohort, we  
352 observed 92% accuracy, sensitivity of mode 100% and mean 75%, and specificity of mode 100%,  
353 mean 99% (**Figure 4**). As in previous analyses, *KIR3DL1/S1* alleles having allele frequency  $> 1\%$   
354 have greater imputation accuracy than those  $< 1\%$  (**Figure 4**). In this analysis the modal sensitivity  
355 of alleles with a frequency  $< 1\%$  was 0% with a mean of 33%. By contrast, *KIR3DL1/S1* alleles  
356 with a frequency  $> 1\%$  had a modal sensitivity of 100% and a mean of 85%. These experiments



357 show that high resolution *KIR3DL1/S1* genotypes can be imputed from low-density SNP arrays,  
358 and with similar accuracy to high-density arrays.

359

### 360 ***Obtaining and Running PONG***

361 The PONG program is installed using the command line and opened as a library in R (R version  
362 2.14.0 – 4.0.0.) (85). PONG can be run using WG-SNP data mapped either to hg19 or hg38. The  
363 imputation algorithm does not require data to be phased (73). The Global model (hg19) and the  
364 model built with the EUR group (hg38) are available for download. Other models will be added  
365 as they become available. Using our Global model, we estimate that 1,000 individuals could be  
366 imputed every 15 minutes using a single core on a laboratory server, such as the one we have used.  
367 Users can also create their own models when WG-SNP data and *KIR3DL1/S1* allele genotypes are  
368 available, and modify the data input and filtering parameters, as described in the tutorial.

369 • The imputation models are available at <https://github.com/NormanLabUCD/PONG>

370 • The 1,000 Genomes test data can be found in ref (77) and **Table S1**.

371 • A tutorial describing the pipeline for model building and testing is available at:

372 <https://github.com/NormanLabUCD/PONG/inst/doc/>

373

## 374 **Discussion**

375 Knowledge of *KIR3DL1/S1* diversity can help predict the course of specific infections, immune-  
376 mediated diseases, and their therapies (86-92). However, by virtue of the polymorphic and  
377 structural complexity at the locus, it is often ignored in genome-wide association studies. The  
378 primary goal of this study was to develop a model trained to impute *KIR3DL1/S1* alleles rapidly  
379 from WG-SNP data encompassing a wide range of human genetic diversity. We built imputation  
380 models using high-density WG-SNP data (76) and high-resolution *KIR3DL1/S1* allele calls (77)  
381 from the five broadly defined 1,000 Genomes population groups, and then built a model for the  
382 Global group. To achieve these goals, we adapted the coding framework and algorithm from  
383 HIBAG (73) in a modification that we have named PONG. We determined that the imputation  
384 models are most effective when both the WG-SNP data and *KIR3DL1/S1* alleles have been filtered  
385 to remove alleles that occur infrequently. The former filter to reduce the model building run time  
386 and the latter to increase imputation accuracy. The resulting range of imputation accuracies of the  
387 final Global model was 89% for Africans and South Asians, to 97% for East Asians. The 1,000  
388 Genomes WG-SNP data has a dense set of genotypes, including 1,832,506 SNPs from  
389 chromosome 19 (76). Other genotype chips used for disease association studies have less dense  
390 sets of SNPs, including the Infinium Immunoarray, which targets markers associated with  
391 autoimmune disease and inflammatory disorders (78). Because *KIR3DL1/S1* diversity is  
392 associated with development or severity of multiple autoimmune diseases (20, 22, 23, 25, 93), we  
393 tested the accuracy of imputation using results generated from this genotyping chip, and achieved  
394 similar imputation accuracy as achieved from the high-density array.

395

396 Although PONG is effective in imputing *KIR3DL1/S1* alleles, there are a few limitations to this  
397 program that we are optimistic will improve over time. As observed for *HLA* (94), we found a  
398 negative correlation between the accuracy of PONG and the diversity of *KIR3DL1/S1* alleles in a  
399 population. For example, African populations have the highest number of distinct *KIR3DL1/S1*  
400 alleles as well as the highest number with a frequency below 1%. The result is that imputation  
401 accuracy is lowest in Africans. Conversely, the East Asian group has the lowest number of  
402 *KIR3DL1/S1* alleles of allele frequency below 1%, and the highest imputation accuracy. Therefore,  
403 PONG is most effective at imputing the most frequent alleles. The imputation accuracy of the  
404 model will improve over time as more immunogenetic studies of *KIR3DL1/S1* are conducted, thus  
405 expanding our sample set for building more robust and diverse models. Given that the model is  
406 open source, and that PONG has a model building function available, this can be achieved both by  
407 the developers and users. PONG is also less accurate at imputing the absence of the *KIR3DL1/S1*  
408 gene (which we designated \*00000), and we were only able to impute this null *KIR3DL1/S1* allele  
409 at an accuracy of 35% using a global model. However KIR\*IMP, which is targeted to *KIR* gene  
410 content diversity, is able to impute the presence or absence of *KIR3DL1/S1* with an accuracy above  
411 90% (82). Therefore, PONG can be coupled with KIR\*IMP to improve the accuracy of imputing  
412 the '*KIR3DL1/S1* absent' allele.

413  
414 Accurate sequencing and assembly can be challenging for highly polymorphic and structurally  
415 diverse regions of the genome (95). Both these phenomena are characteristics of the *KIR* locus  
416 (29). Therefore, PONG relies on high quality WG-SNP data with robust quality control measures  
417 implemented in SNP calling pipelines. New techniques to improve the identification of structural  
418 variation are being created, including long-range optical mapping, which uses the optical signal

419 strength from each SNP genotype to identify deletions and duplications (96). Together, an  
420 increased sampling of individuals having rare *KIR3DL1/S1* alleles and better characterization of  
421 structural variation from WG-SNP data will likely improve the imputation accuracy of PONG.

422

423 Highly polymorphic interactions of *KIR3DL1/S1* with HLA-A and B modulate the critical  
424 functions of NK cells in immunity, which include the destruction of infected or cancerous cells  
425 (2). Combinatorial diversity of *KIR3DL1/S1* with HLA-A and B allotypes thus affects the  
426 susceptibility and course of multiple immune-mediated diseases. Several methods are available to  
427 impute *HLA* alleles (70-73), but large-scale genetic studies often exclude analysis of *KIR3DL1/S1*  
428 due to the exceptional polymorphism and structural diversity of the genomic region. A secondary  
429 goal of this study was thus to produce imputation models that could be used in conjunction with  
430 existing models to impute the combinatorial diversity of *KIR3DL1/S1* and HLA allotypes. By  
431 comparison with *KIR3DL1/S1*, the mean imputation accuracy for HIBAG across seven *HLA* genes  
432 was 81.2% in African populations and 91.1% in East Asians (73). In African populations, *HLA-*  
433 *DPBI* had the lowest imputation accuracy at 74.2% and *HLA-A* had the highest observed accuracy  
434 at 92.4%. The corresponding imputation accuracies of these *HLA* genes in East Asians were 89.8%  
435 and 92.1% respectively (73). Therefore, the mean accuracy of *KIR3DL1/S1* allele imputation  
436 described herein is equivalent, and likely better than that obtained for *HLA class I* and *II* using the  
437 same underlying algorithm. We therefore propose that using this algorithm to impute both  
438 *KIR3DL1/S1* and HLA-A and B genotypes from WG-SNP data presents a considerable advantage  
439 over other approaches. This approach is particularly applicable for studies of Biobank data, where  
440 targeted sequencing of *KIR3DL1/S1* and *HLA-A* and *B* from many thousands of individuals is not

441 currently tractable. Utilizing our pre-built models, PONG can be implemented to make genetic  
442 association studies of *KIR3DL1/S1* in combination with *HLA-A* and *B* possible at very large scale.

443

#### 444 **Acknowledgements**

445 This study was performed with support from National Institutes of Health of the USA, R56  
446 AI151549 and R01 AI128775 (PN), and R01HG010297 (CG).

447

#### 448 **Data availability statement**

449 All code written in support of this publication, imputation models, test data and documentation on  
450 installing and running are publicly available at <https://github.com/NormanLabUCD/PONG>

451

#### 452 **Conflict of Interest**

453 SL is a partner in Peptide Groove LLP. All other authors declare no competing interest.

454

#### 455 **Author Contributions**

456 **Conceptualization:** Paul J. Norman, Damjan Vukcevic and Stephen Leslie

457

458 **Data Curation:** Genelle F Harrison, Laura Ann Leaton, Marte K Viken and Paul J. Norman

459 **Formal analysis:** Genelle F Harrison and Laura Ann Leaton

460 **Funding acquisition:** Paul J. Norman

461 **Investigation:** Laura Ann Leaton, Genelle F Harrison and Paul J. Norman

462 **Methodology:** Genelle F Harrison, Laura Ann Leaton, Jonathan Shortt, Christopher R Gignoux  
463 and Paul J. Norman

464 **Project Administration:** Paul J. Norman

465 **Resources:** Marte K Viken, Benedicte A Lie, Christopher R Gignoux and Paul J. Norman

466  
467 **Software:** Genelle F Harrison, Laura Ann Leaton, Jonathan Shortt and Erica A Harrison

468 **Supervision:** Paul J. Norman

469 **Validation:** Genelle F Harrison, Laura Ann Leaton and Erica A Harrison

470 **Visualization:** Genelle F Harrison, Laura Ann Leaton and Paul J. Norman

471 **Writing – Original Draft Preparation:** Genelle F Harrison, Laura Ann Leaton and Paul J.  
472 Norman

473 **Writing – Review & Editing:** Genelle F Harrison and Paul J. Norman and all authors

474

475 **Figure legends**

476

477 **Figure 1. Genomic location of *KIR3DL1/S1* and overview of allele imputation workflow.**

478 **A.** Shows the location of the *KIR3DL1/S1* gene on five examples of common *KIR* haplotypes.

479 *KIR3DL1/S1* is shaded in blue, and other *KIR* genes are shaded grey. The *KIR3DL1/S1* gene can

480 be absent (haplotype 4) or fused in-frame with *KIR3DL2* (haplotype 5) (84). The human genome

481 coordinates (build hg19) from which classifiers were drawn for imputation are given at the top.

482 **B.** Schematic of model building, testing and output for the imputation of *KIR3DL1/S1* alleles using

483 PONG. Shown are the required input files and their format for model building (blue) and testing

484 (green). Red boxes give an example of the output from the imputation.

485

486

487 **Figure 2. Optimization of *KIR3DL1/S1* allele imputation using data from Europeans.**

488 **A.** Bar graph shows the *KIR3DL1/S1* allele frequencies in the combined EUR population group

489 comprised of 353 individuals from Italy, Finland, United Kingdom, Spain, or Utah. The alleles

490 were determined from high-throughput sequence data (77).

491 **B.** Shown is a summary of the results obtained using models tested during optimization. From left

492 to right are the filtered criteria (SNPs or *KIR3DL1/S1* alleles), the filtering threshold values,

493 resulting model build time, and accuracy of the imputed genotypes. Grey dotted arrow indicates

494 that the final model that was built using  $MAC < 3$  for SNPs and for *KIR3DL1/S1* alleles.

495 **C.** Shows the imputation accuracy for each *KIR3DL1/S1* allele present in the final filtered EUR

496 data set. Blue bars indicate the sensitivity (% of times a given allele was called as present when

497 known to be present). Red line indicates specificity (% of times a given allele was called as absent

498 when known to be absent).

499

500 **Figure 3. Accurate imputation of *KIR3DL1/S1* alleles using a Global population model.**

501 **A.** Bar graphs shows the number of *KIR3DL1/S1* alleles present in each of the five broad  
502 population groups of the 1,000 Genomes database. The bar colors indicate: (pink) the number of  
503 alleles present before filtering, (ruby) by MAC < 3 filtering, and (burgundy) by combining the five  
504 groups to form a Global population and then MAC < 3 filtering. The population groups are East  
505 Asian (EAS), European (EUR), South Asian (SAS), American (AMR) and African (AFR).

506 **B.** Shows the imputation accuracy obtained for each of the population group and the Global  
507 models. (Within group) the model was built using 50% of the indicated group and tested on the  
508 other 50%. (Global) the model was built using 50% of all individuals and tested on the remaining  
509 50% of the specified group.

510 **C.** and **D.** Show the imputation efficacy for each allele present in the final Global data set. Blue  
511 bars indicate the sensitivity (% of times a given allele was called as present when known to be  
512 present). Red line indicates specificity (% of times a given allele was called as absent when known  
513 to be absent). Blue dots indicate the *KIR3DL1/S1* allele frequencies in the Global population.

514

515 **Figure 4. Accurate imputation of *KIR3DL1/S1* alleles from ImmunoChip SNP data.**

516 Bar graph shows the efficiency of *KIR3DL1/S1* allele imputation using a model built and tested on  
517 a cohort from Norway who also had their *KIR3DL1/S1* alleles genotyped to high resolution. Blue  
518 bars indicate the sensitivity (% of times a given allele was called as present when known to be  
519 present). Red line indicates specificity (% of times a given allele was called as absent when known  
520 to be absent).

521

522 **Supporting Information**



523 **S1 Table** (xlsx) *KIR3DL1/S1* genotypes of 1,000 Genomes Individuals

524 **S2 Table** (xlsx) *KIR3DL1/S1* genotypes of Norwegian Individuals

525 **S3 Table** (xlsx) Parameters and Output statistics of Imputation Models

526

## 527 References

- 528 1. Parham P, Norman PJ, Abi-Rached L, Guethlein LA. Variable NK cell receptors  
529 exemplified by human KIR3DL1/S1. *The Journal of Immunology*. 2011;187(1):11-9.
- 530 2. O'Connor GM, McVicar D. The yin-yang of KIR3DL1/S1: molecular mechanisms and  
531 cellular function. *Critical reviews in immunology*. 2013;33(3):203-18.
- 532 3. Quatrini L, Chiesa MD, Sivori S, Mingari MC, Pende D, Moretta L. Human NK cells, their  
533 receptors and function. *European journal of immunology*. 2021.
- 534 4. Hammer Q, Rückert T, Romagnani C. Natural killer cell specificity for viral infections.  
535 *Nature immunology*. 2018;19(8):800-8.
- 536 5. Litwin V, Gumperz J, Parham P, Phillips JH, Lanier LL. NKB1: a natural killer cell  
537 receptor involved in the recognition of polymorphic HLA-B molecules. *The Journal of*  
538 *experimental medicine*. 1994;180(2):537-43.
- 539 6. Colonna M, Samaridis J. Cloning of immunoglobulin-superfamily members associated  
540 with HLA-C and HLA-B recognition by human natural killer cells. *Science (New York, NY)*.  
541 1995;268(5209):405-8.
- 542 7. Garcia-Beltran WF, Hölzemer A, Martrus G, Chung AW, Pacheco Y, Simoneau CR, et al.  
543 Open conformers of HLA-F are high-affinity ligands of the activating NK-cell receptor KIR3DS1.  
544 *Nat Immunol*. 2016;17(9):1067-74.
- 545 8. Kiani Z, Bruneau J, Geraghty DE, Bernard NF. HLA-F on Autologous HIV-Infected Cells  
546 Activates Primary NK Cells Expressing the Activating Killer Immunoglobulin-Like Receptor  
547 KIR3DS1. *Journal of virology*. 2019;93(18).
- 548 9. O'Connor GM, Vivian JP, Gostick E, Pymm P, Lafont BA, Price DA, et al. Peptide-  
549 Dependent Recognition of HLA-B\*57:01 by KIR3DS1. *Journal of virology*. 2015;89(10):5213-  
550 21.
- 551 10. Ahlenstiel G, Martin MP, Gao X, Carrington M, Rehermann B. Distinct KIR/HLA  
552 compound genotypes affect the kinetics of human antiviral natural killer cell responses. *The*  
553 *Journal of clinical investigation*. 2008;118(3):1017-26.
- 554 11. Digitale JC, Callaway PC, Martin M, Nelson G, Viard M, Rek J, et al. Inhibitory KIR  
555 ligands are associated with higher *P. falciparum* parasite prevalence. *The Journal of infectious*  
556 *diseases*. 2020.
- 557 12. Forlenza CJ, Boudreau JE, Zheng J, Le Luduec JB, Chamberlain E, Heller G, et al.  
558 KIR3DL1 Allelic Polymorphism and HLA-B Epitopes Modulate Response to Anti-GD2  
559 Monoclonal Antibody in Patients With Neuroblastoma. *Journal of clinical oncology : official*  
560 *journal of the American Society of Clinical Oncology*. 2016;34(21):2443-51.
- 561 13. López-Vázquez A, Rodrigo L, Martínez-Borra J, Pérez R, Rodríguez M, Fdez-Morera JL,  
562 et al. Protective effect of the HLA-Bw4I80 epitope and the killer cell immunoglobulin-like  
563 receptor 3DS1 gene against the development of hepatocellular carcinoma in patients with hepatitis  
564 C virus infection. *The Journal of infectious diseases*. 2005;192(1):162-5.
- 565 14. MacFarlane AWt, Jillab M, Smith MR, Alpaugh RK, Cole ME, Litwin S, et al. NK cell  
566 dysfunction in chronic lymphocytic leukemia is associated with loss of the mature cells expressing  
567 inhibitory killer cell Ig-like receptors. *Oncoimmunology*. 2017;6(7):e1330235.
- 568 15. Martin MP, Qi Y, Gao X, Yamada E, Martin JN, Pereyra F, et al. Innate partnership of  
569 HLA-B and KIR3DL1 subtypes against HIV-1. *Nature Genetics*. 2007;39(6):733-40.

- 570 16. Ruggeri L, Mancusi A, Urbani E, Velardi A. Identifying NK Alloreactive Donors for  
571 Haploidentical Hematopoietic Stem Cell Transplantation. *Methods in molecular biology* (Clifton,  
572 NJ). 2016;1393:141-5.
- 573 17. Trefny MP, Rothschild SI, Uhlenbrock F, Rieder D, Kasenda B, Stanczak MA, et al. A  
574 Variant of a Killer Cell Immunoglobulin-like Receptor Is Associated with Resistance to PD-1  
575 Blockade in Lung Cancer. *Clinical cancer research : an official journal of the American*  
576 *Association for Cancer Research*. 2019;25(10):3026-34.
- 577 18. Greenland JR, Sun H, Calabrese D, Chong T, Singer JP, Kukreja J, et al. HLA Mismatching  
578 Favoring Host-Versus-Graft NK Cell Activity Via KIR3DL1 Is Associated With Improved  
579 Outcomes Following Lung Transplantation. *American journal of transplantation : official journal*  
580 *of the American Society of Transplantation and the American Society of Transplant Surgeons*.  
581 2017;17(8):2192-9.
- 582 19. van der Ploeg K, Le Luduec JB, Stevenson PA, Park S, Gooley TA, Petersdorf EW, et al.  
583 HLA-A alleles influencing NK cell function impact AML relapse following allogeneic  
584 hematopoietic cell transplantation. *Blood advances*. 2020;4(19):4955-64.
- 585 20. Ahn RS, Moslehi H, Martin MP, Abad-Santos M, Bowcock AM, Carrington M, et al.  
586 Inhibitory KIR3DL1 alleles are associated with psoriasis. *Br J Dermatol*. 2016;174(2):449-51.
- 587 21. Anderson KM, Augusto DG, Dandekar R, Shams H, Zhao C, Yusufali T, et al. Killer Cell  
588 Immunoglobulin-like Receptor Variants Are Associated with Protection from Symptoms  
589 Associated with More Severe Course in Parkinson Disease. *J Immunol*. 2020.
- 590 22. Augusto DG, Lobo-Alves SC, Melo MF, Pereira NF, Petzl-Erler ML. Activating KIR and  
591 HLA Bw4 ligands are associated to decreased susceptibility to pemphigus foliaceus, an  
592 autoimmune blistering skin disease. *PloS one*. 2012;7(7):e39991.
- 593 23. Lorentzen AR, Karlsen TH, Olsson M, Smestad C, Mero IL, Woldseth B, et al. Killer  
594 immunoglobulin-like receptor ligand HLA-Bw4 protects against multiple sclerosis. *Annals of*  
595 *neurology*. 2009;65(6):658-66.
- 596 24. Petrushkin H, Norman PJ, Lougee E, Parham P, Wallace GR, Stanford MR, et al.  
597 KIR3DL1/S1 Allotypes Contribute Differentially to the Development of Behçet Disease. *The*  
598 *Journal of Immunology*. 2019;203(6):1629-35.
- 599 25. Vendelbosch S, Heslinga SC, John M, van Leeuwen K, Geissler J, de Boer M, et al. Study  
600 on the protective effect of the KIR3DL1 gene in ankylosing spondylitis. *Arthritis & rheumatology*  
601 *(Hoboken, NJ)*. 2015;67(11):2957-65.
- 602 26. Yawata N, Shirane M, Woon K, Lim X, Tanaka H, Kawano YI, et al. Molecular Signatures  
603 of Natural Killer Cells in CMV-Associated Anterior Uveitis, A New Type of CMV-Induced  
604 Disease in Immunocompetent Individuals. *International journal of molecular sciences*. 2021;22(7).
- 605 27. Erbe AK, Wang W, Carmichael L, Hoefges A, Grzywacz B, Reville PK, et al. Follicular  
606 lymphoma patients with KIR2DL2 and KIR3DL1 and their ligands (HLA-C1 and HLA-Bw4)  
607 show improved outcome when receiving rituximab. *Journal for immunotherapy of cancer*.  
608 2019;7(1):70.
- 609 28. Shaffer BC, Hsu KC. Selection of allogeneic hematopoietic cell transplant donors to  
610 optimize natural killer cell alloreactivity. *Seminars in hematology*. 2020;57(4):167-74.
- 611 29. Béziat V, Hilton HG, Norman PJ, Traherne JA. Deciphering the killer-cell  
612 immunoglobulin-like receptor system at super-resolution for natural killer and T-cell biology.  
613 *Immunology*. 2017;150(3):248-64.

- 614 30. Robinson J, Halliwell JA, Hayhurst JD, Flicek P, Parham P, Marsh SG. The IPD and  
615 IMGT/HLA database: allele variant databases. *Nucleic Acids Res.* 2015;43(Database issue):D423-  
616 31.
- 617 31. Norman PJ, Abi-Rached L, Gendzekhadze K, Korbel D, Gleimer M, Rowley D, et al.  
618 Unusual selection on the KIR3DL1/S1 natural killer cell receptor in Africans. *Nat Genet.*  
619 2007;39(9):1092-9.
- 620 32. Nunes K, Maia MHT, Dos Santos EJM, Dos Santos SEB, Guerreiro JF, Petzl-Erler ML, et  
621 al. How natural selection shapes genetic differentiation in the MHC region: A case study with  
622 Native Americans. *Hum Immunol.* 2021.
- 623 33. Deng Z, Zhen J, Harrison GF, Zhang G, Chen R, Sun G, et al. Adaptive Admixture of HLA  
624 class I Allotypes Enhanced Genetically Determined Strength of Natural Killer Cells in East Asians.  
625 *Molecular biology and evolution.* 2021.
- 626 34. Koyro TF, Kraus E, Lunemann S, Hölzemer A, Wulf S, Jung J, et al. Upregulation of HLA-  
627 F expression by BK polyomavirus infection induces immune recognition by KIR3DS1-positive  
628 natural killer cells. *Kidney international.* 2020.
- 629 35. Townsley E, O'Connor G, Cosgrove C, Woda M, Co M, Thomas SJ, et al. Interaction of a  
630 dengue virus NS1-derived peptide with the inhibitory receptor KIR3DL1 on natural killer cells.  
631 *Clinical and experimental immunology.* 2016;183(3):419-30.
- 632 36. Beltrame LM, Sell AM, Moliterno RA, Clementino SL, Cardozo DM, Dalalio MM, et al.  
633 Influence of KIR genes and their HLA ligands in susceptibility to dengue in a population from  
634 southern Brazil. *Tissue antigens.* 2013;82(6):397-404.
- 635 37. Carrington M, Wang S, Martin MP, Gao X, Schiffman M, Cheng J, et al. Hierarchy of  
636 resistance to cervical neoplasia mediated by combinations of killer immunoglobulin-like receptor  
637 and human leukocyte antigen loci. *The Journal of experimental medicine.* 2005;201(7):1069-75.
- 638 38. Luo M, Czarnecki C, Nebroski M, Kimani J, Bernard N, Plummer FA. KIR3DL1 alleles  
639 and their epistatic interactions with human leukocyte antigen class I influence resistance and  
640 susceptibility to HIV-1 acquisition in the Pumwani sex worker cohort. *AIDS (London, England).*  
641 2018;32(7):841-50.
- 642 39. Hollenbach JA, Pando MJ, Caillier SJ, Gourraud PA, Oksenberg JR. The killer  
643 immunoglobulin-like receptor KIR3DL1 in combination with HLA-Bw4 is protective against  
644 multiple sclerosis in African Americans. *Genes Immun.* 2016;17(3):199-202.
- 645 40. Saito H, Hirayama A, Umemura T, Joshita S, Mukawa K, Suga T, et al. Association  
646 between KIR-HLA combination and ulcerative colitis and Crohn's disease in a Japanese  
647 population. *PLoS One.* 2018;13(4):e0195778.
- 648 41. Umemura T, Joshita S, Saito H, Yoshizawa K, Norman GL, Tanaka E, et al. KIR/HLA  
649 genotypes confer susceptibility and progression in patients with autoimmune hepatitis. *JHEP*  
650 *reports : innovation in hepatology.* 2019;1(5):353-60.
- 651 42. Deng Z, Zhao J, Cai S, Qi Y, Yu Q, Martin MP, et al. Natural Killer Cells Offer Differential  
652 Protection From Leukemia in Chinese Southern Han. *Frontiers in immunology.* 2019;10:1646.
- 653 43. Fadda L, O'Connor GM, Kumar S, Piechocka-Trocha A, Gardiner CM, Carrington M, et  
654 al. Common HIV-1 peptide variants mediate differential binding of KIR3DL1 to HLA-Bw4  
655 molecules. *Journal of virology.* 2011;85(12):5970-4.
- 656 44. Gooneratne SL, Richard J, Lee WS, Finzi A, Kent SJ, Parsons MS. Slaying the Trojan  
657 horse: natural killer cells exhibit robust anti-HIV-1 antibody-dependent activation and cytolysis  
658 against allogeneic T cells. *Journal of virology.* 2015;89(1):97-109.

- 659 45. Song R, Lisovsky I, Lebouché B, Routy JP, Bruneau J, Bernard NF. HIV protective  
660 KIR3DL1/S1-HLA-B genotypes influence NK cell-mediated inhibition of HIV replication in  
661 autologous CD4 targets. *PLoS pathogens*. 2014;10(1):e1003867.
- 662 46. Koehler RN, Alter G, Tovanabutra S, Saathoff E, Arroyo MA, Walsh AM, et al. Natural  
663 killer cell-mediated innate sieve effect on HIV-1: the impact of KIR/HLA polymorphism on HIV-  
664 1 subtype-specific acquisition in east Africa. *The Journal of infectious diseases*. 2013;208(8):1250-  
665 4.
- 666 47. Prakash S, Sarangi AN, Alam S, Sonawane A, Sharma RK, Agrawal S. Putative role of  
667 KIR3DL1/3DS1 alleles and HLA-Bw4 ligands with end stage renal disease and long term renal  
668 allograft survival. *Gene*. 2017;637:219-29.
- 669 48. Stern M, Hadaya K, Hönger G, Martin PY, Steiger J, Hess C, et al. Telomeric rather than  
670 centromeric activating KIR genes protect from cytomegalovirus infection after kidney  
671 transplantation. *American journal of transplantation : official journal of the American Society of*  
672 *Transplantation and the American Society of Transplant Surgeons*. 2011;11(6):1302-7.
- 673 49. Venstrom JM, Gooley TA, Spellman S, Pring J, Malkki M, Dupont B, et al. Donor  
674 activating KIR3DS1 is associated with decreased acute GVHD in unrelated allogeneic  
675 hematopoietic stem cell transplantation. *Blood*. 2010;115(15):3162-5.
- 676 50. Foley BA, De Santis D, Van Beelen E, Lathbury LJ, Christiansen FT, Witt CS. The  
677 reactivity of Bw4+ HLA-B and HLA-A alleles with KIR3DL1: implications for patient and donor  
678 suitability for haploidentical stem cell transplantations. *Blood*. 2008;112(2):435-43.
- 679 51. Vivian JP, Duncan RC, Berry R, O'Connor GM, Reid HH, Beddoe T, et al. Killer cell  
680 immunoglobulin-like receptor 3DL1-mediated recognition of human leukocyte antigen B. *Nature*.  
681 2011;479(7373):401-5.
- 682 52. Boudreau JE, Hsu KC. Natural killer cell education in human health and disease. *Current*  
683 *opinion in immunology*. 2018;50:102-11.
- 684 53. Malmberg KJ, Sohlberg E, Goodridge JP, Ljunggren HG. Immune selection during tumor  
685 checkpoint inhibition therapy paves way for NK-cell "missing self" recognition. *Immunogenetics*.  
686 2017;69(8-9):547-56.
- 687 54. Parsons MS, Zipperlen K, Gallant M, Grant M. Killer cell immunoglobulin-like receptor  
688 3DL1 licenses CD16-mediated effector functions of natural killer cells. *J Leukoc Biol*.  
689 2010;88(5):905-12.
- 690 55. Saunders PM, MacLachlan BJ, Widjaja J, Wong SC, Oates CVL, Rossjohn J, et al. The  
691 Role of the HLA Class I  $\alpha 2$  Helix in Determining Ligand Hierarchy for the Killer Cell Ig-like  
692 Receptor 3DL1. *J Immunol*. 2021;206(4):849-60.
- 693 56. Saunders PM, Pymm P, Pietra G, Hughes VA, Hitchen C, O'Connor GM, et al. Killer cell  
694 immunoglobulin-like receptor 3DL1 polymorphism defines distinct hierarchies of HLA class I  
695 recognition. *The Journal of experimental medicine*. 2016;213(5):791-807.
- 696 57. Kim S, Sunwoo JB, Yang L, Choi T, Song YJ, French AR, et al. HLA alleles determine  
697 differences in human natural killer cell responsiveness and potency. *Proceedings of the National*  
698 *Academy of Sciences of the United States of America*. 2008;105(8):3053-8.
- 699 58. Li H, Pascal V, Martin MP, Carrington M, Anderson SK. Genetic control of variegated  
700 KIR gene expression: polymorphisms of the bi-directional KIR3DL1 promoter are associated with  
701 distinct frequencies of gene expression. *PLoS genetics*. 2008;4(11):e1000254.
- 702 59. Yawata M, Yawata N, Draghi M, Little AM, Partheniou F, Parham P. Roles for HLA and  
703 KIR polymorphisms in natural killer cell repertoire selection and modulation of effector function.  
704 *The Journal of experimental medicine*. 2006;203(3):633-45.

- 705 60. Carlomagno S, Falco M, Bono M, Alicata C, Garbarino L, Mazzocco M, et al. KIR3DS1-  
706 Mediated Recognition of HLA-*\*B51*: Modulation of KIR3DS1 Responsiveness by Self HLA-B  
707 Allotypes and Effect on NK Cell Licensing. *Frontiers in immunology*. 2017;8:581.
- 708 61. O'Connor GM, Yamada E, Rampersaud A, Thomas R, Carrington M, McVicar DW.  
709 Analysis of binding of KIR3DS1\*014 to HLA suggests distinct evolutionary history of KIR3DS1.  
710 *J Immunol*. 2011;187(5):2162-71.
- 711 62. Thananchai H, Gillespie G, Martin MP, Bashirova A, Yawata N, Yawata M, et al. Cutting  
712 Edge: Allele-specific and peptide-dependent interactions between KIR3DL1 and HLA-A and  
713 HLA-B. *J Immunol*. 2007;178(1):33-7.
- 714 63. Körner C, Altfeld M. Role of KIR3DS1 in human diseases. *Frontiers in immunology*.  
715 2012;3:326.
- 716 64. Kanya P, Boulet S, Tsoukas CM, Routy JP, Thomas R, Côté P, et al. Receptor-ligand  
717 requirements for increased NK cell polyfunctional potential in slow progressors infected with  
718 HIV-1 coexpressing KIR3DL1\*h/\*y and HLA-B\*57. *Journal of virology*. 2011;85(12):5949-60.
- 719 65. Berinstein J, Pollock R, Pellett F, Thavaneswaran A, Chandran V, Gladman DD.  
720 Association of variably expressed KIR3dl1 alleles with psoriatic disease. *Clinical rheumatology*.  
721 2017;36(10):2261-6.
- 722 66. Boudreau JE, Giglio F, Gooley TA, Stevenson PA, Le Luduec JB, Shaffer BC, et al.  
723 KIR3DL1/HLA-B Subtypes Govern Acute Myelogenous Leukemia Relapse After Hematopoietic  
724 Cell Transplantation. *Journal of clinical oncology : official journal of the American Society of*  
725 *Clinical Oncology*. 2017;35(20):2268-78.
- 726 67. Boudreau JE, Mulrooney TJ, Le Luduec JB, Barker E, Hsu KC. KIR3DL1 and HLA-B  
727 Density and Binding Calibrate NK Education and Response to HIV. *J Immunol*.  
728 2016;196(8):3398-410.
- 729 68. Martin MP, Naranbhai V, Shea PR, Qi Y, Ramsuran V, Vince N, et al. Killer cell  
730 immunoglobulin-like receptor 3DL1 variation modifies HLA-B\*57 protection against HIV-1. *The*  
731 *Journal of clinical investigation*. 2018;128(5):1903-12.
- 732 69. Leslie S, Donnelly P, McVean G. A statistical method for predicting classical HLA alleles  
733 from SNP data. *American journal of human genetics*. 2008;82(1):48-56.
- 734 70. Li SS, Wang H, Smith A, Zhang B, Zhang XC, Schoch G, et al. Predicting multiallelic  
735 genes using unphased and flanking single nucleotide polymorphisms. *Genetic epidemiology*.  
736 2011;35(2):85-92.
- 737 71. Dilthey A, Leslie S, Moutsianas L, Shen J, Cox C, Nelson MR, et al. Multi-population  
738 classical HLA type imputation. *PLoS computational biology*. 2013;9(2):e1002877.
- 739 72. Jia X, Han B, Onengut-Gumuscu S, Chen WM, Concannon PJ, Rich SS, et al. Imputing  
740 amino acid polymorphisms in human leukocyte antigens. *PLoS One*. 2013;8(6):e64683.
- 741 73. Zheng X, Shen J, Cox C, Wakefield JC, Ehm MG, Nelson MR, et al. HIBAG--HLA  
742 genotype imputation with attribute bagging. *Pharmacogenomics J*. 2014;14(2):192-200.
- 743 74. Breiman L. Heuristics of instability and stabilization in model selection. *Annals of*  
744 *Statistics*. 1996;24(6):2350-83.
- 745 75. Marin WM, Dandekar R, Augusto DG, Yusufali T, Heyn B, Hofmann J, et al. High-  
746 throughput Interpretation of Killer-cell Immunoglobulin-like Receptor Short-read Sequencing  
747 Data with PING. *bioRxiv*. 2021:2021.03.24.436770.
- 748 76. Auton A, Abecasis GR, Altshuler DM, Durbin RM, Abecasis GR, Bentley DR, et al. A  
749 global reference for human genetic variation. *Nature*. 2015;526(7571):68-74.

- 750 77. Norman PJ, Hollenbach JA, Nemat-Gorgani N, Marin WM, Norberg SJ, Ashouri E, et al.  
751 Defining KIR and HLA class I genotypes at highest resolution via high-throughput sequencing.  
752 The American Journal of Human Genetics. 2016;99(2):375-91.
- 753 78. Trynka G, Hunt KA, Bockett NA, Romanos J, Mistry V, Szperl A, et al. Dense genotyping  
754 identifies and localizes multiple common and rare variant association signals in celiac disease.  
755 Nature genetics. 2011;43(12):1193.
- 756 79. Lande A, Fluge Ø, Strand EB, Flåm ST, Sosa DD, Mella O, et al. Human Leukocyte  
757 Antigen alleles associated with Myalgic Encephalomyelitis/Chronic Fatigue Syndrome  
758 (ME/CFS). Scientific reports. 2020;10(1):5267.
- 759 80. Purcell S, Neale B, Todd-Brown K, Thomas L, Ferreira MA, Bender D, et al. PLINK: a  
760 tool set for whole-genome association and population-based linkage analyses. American journal  
761 of human genetics. 2007;81(3):559-75.
- 762 81. Taliun D, Harris DN, Kessler MD, Carlson J, Szpiech ZA, Torres R, et al. Sequencing of  
763 53,831 diverse genomes from the NHLBI TOPMed Program. BioRxiv. 2019:563866.
- 764 82. Vukcevic D, Traherne JA, Næss S, Ellinghaus E, Kamatani Y, Dilthey A, et al. Imputation  
765 of KIR Types from SNP Variation Data. American journal of human genetics. 2015;97(4):593-  
766 607.
- 767 83. Crum KA, Logue SE, Curran MD, Middleton D. Development of a PCR-SSOP approach  
768 capable of defining the natural killer cell inhibitory receptor (KIR) gene sequence repertoires.  
769 Tissue antigens. 2000;56(4):313-26.
- 770 84. Norman PJ, Abi-Rached L, Gendzekhadze K, Hammond JA, Moesta AK, Sharma D, et al.  
771 Meiotic recombination generates rich diversity in NK cell receptor genes, alleles, and haplotypes.  
772 Genome Res. 2009;19(5):757-69.
- 773 85. Team RC. R: A language and environment for statistical computing. 2013.
- 774 86. Caocci G, Martino B, Greco M, Abruzzese E, Trawinska MM, Lai S, et al. Killer  
775 immunoglobulin-like receptors can predict TKI treatment-free remission in chronic myeloid  
776 leukemia patients. Experimental hematology. 2015;43(12):1015-8.e1.
- 777 87. Erbe AK, Wang W, Reville PK, Carmichael L, Kim K, Mendonca EA, et al. HLA-Bw4-I-  
778 80 Isoform Differentially Influences Clinical Outcome As Compared to HLA-Bw4-T-80 and  
779 HLA-A-Bw4 Isoforms in Rituximab or Dinutuximab-Based Cancer Immunotherapy. Frontiers in  
780 immunology. 2017;8:675.
- 781 88. Gabriel IH, Sergeant R, Szydlo R, Apperley JF, DeLavallade H, Alsuliman A, et al.  
782 Interaction between KIR3DS1 and HLA-Bw4 predicts for progression-free survival after  
783 autologous stem cell transplantation in patients with multiple myeloma. Blood.  
784 2010;116(12):2033-9.
- 785 89. Martin MP, Gao X, Lee JH, Nelson GW, Detels R, Goedert JJ, et al. Epistatic interaction  
786 between KIR3DS1 and HLA-B delays the progression to AIDS. Nat Genet. 2002;31(4):429-34.
- 787 90. Alicata C, Pende D, Meazza R, Canevali P, Loiacono F, Bertaina A, et al. Hematopoietic  
788 stem cell transplantation: Improving alloreactive Bw4 donor selection by genotyping codon 86 of  
789 KIR3DL1/S1. European journal of immunology. 2016;46(6):1511-7.
- 790 91. Gagne K, Busson M, Bignon JD, Balère-Appert ML, Loiseau P, Dormoy A, et al. Donor  
791 KIR3DL1/3DS1 gene and recipient Bw4 KIR ligand as prognostic markers for outcome in  
792 unrelated hematopoietic stem cell transplantation. Biology of blood and marrow transplantation :  
793 journal of the American Society for Blood and Marrow Transplantation. 2009;15(11):1366-75.

- 794 92. Ureshino H, Shindo T, Kojima H, Kusunoki Y, Miyazaki Y, Tanaka H, et al. Allelic  
795 Polymorphisms of KIRs and HLAs Predict Favorable Responses to Tyrosine Kinase Inhibitors in  
796 CML. *Cancer immunology research*. 2018;6(6):745-54.
- 797 93. Díaz-Peña R, Vidal-Castiñeira JR, Alonso-Arias R, Suarez-Alvarez B, Vicario JL, Solana  
798 R, et al. Association of the KIR3DS1\* 013 and KIR3DL1\* 004 alleles with susceptibility to  
799 ankylosing spondylitis. *Arthritis & Rheumatism*. 2010;62(4):1000-6.
- 800 94. Pappas DJ, Lizee A, Paunic V, Beutner KR, Motyer A, Vukcevic D, et al. Significant  
801 variation between SNP-based HLA imputations in diverse populations: the last mile is the hardest.  
802 *Pharmacogenomics J*. 2018;18(3):367-76.
- 803 95. Vollger MR, Dishuck PC, Sorensen M, Welch AE, Dang V, Dougherty ML, et al. Long-  
804 read sequence and assembly of segmental duplications. *Nature methods*. 2019;16(1):88-94.
- 805 96. Mostovoy Y, Yilmaz F, Chow SK, Chu C, Lin C, Geiger EA, et al. Genome mapping  
806 resolves structural variation within segmental duplications associated with  
807 microdeletion/microduplication syndromes. *bioRxiv*. 2020.
- 808



# A

hg19, Chromosome 19: 55,247,563 - 55,361,930

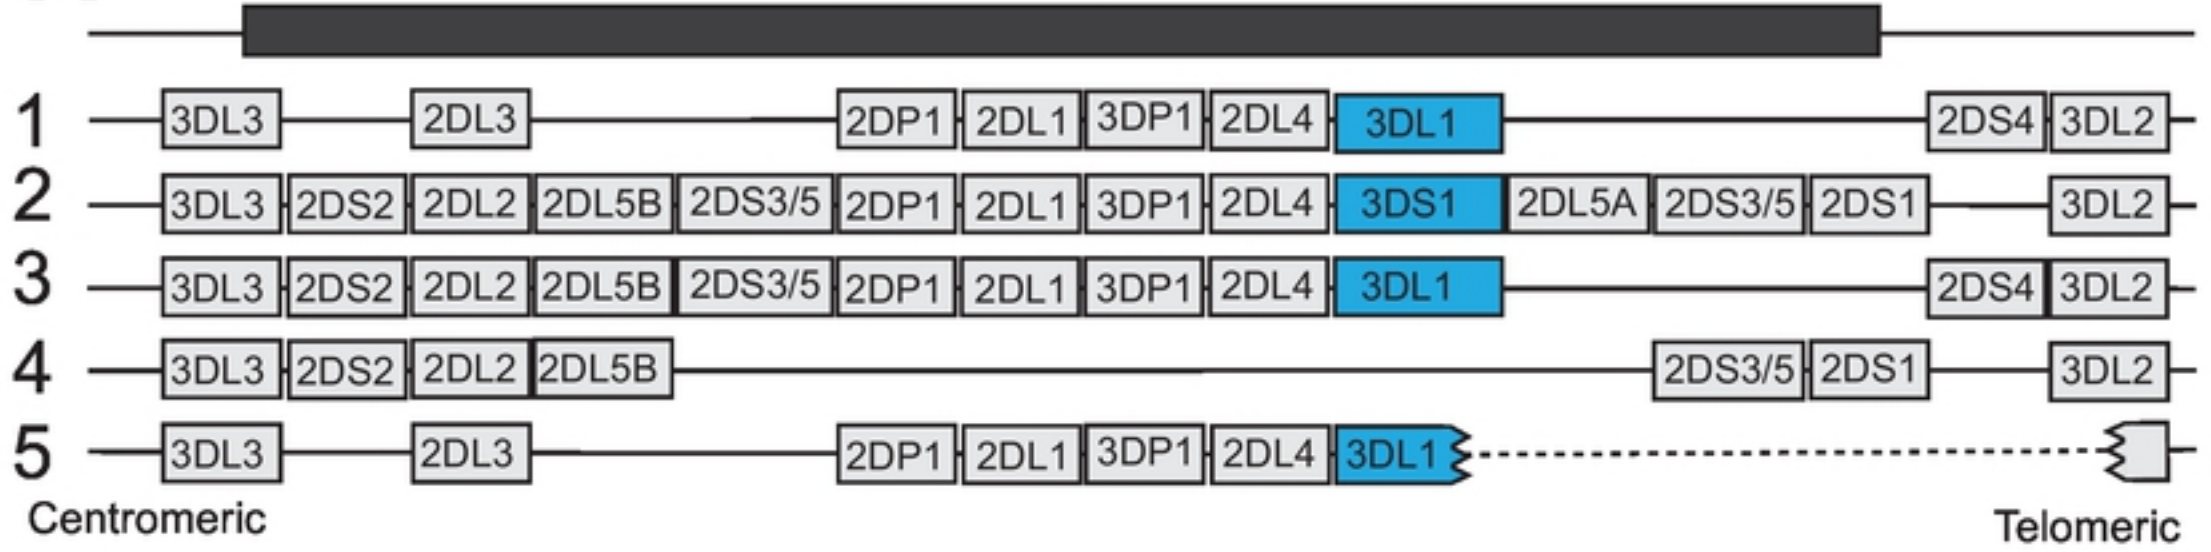

# B

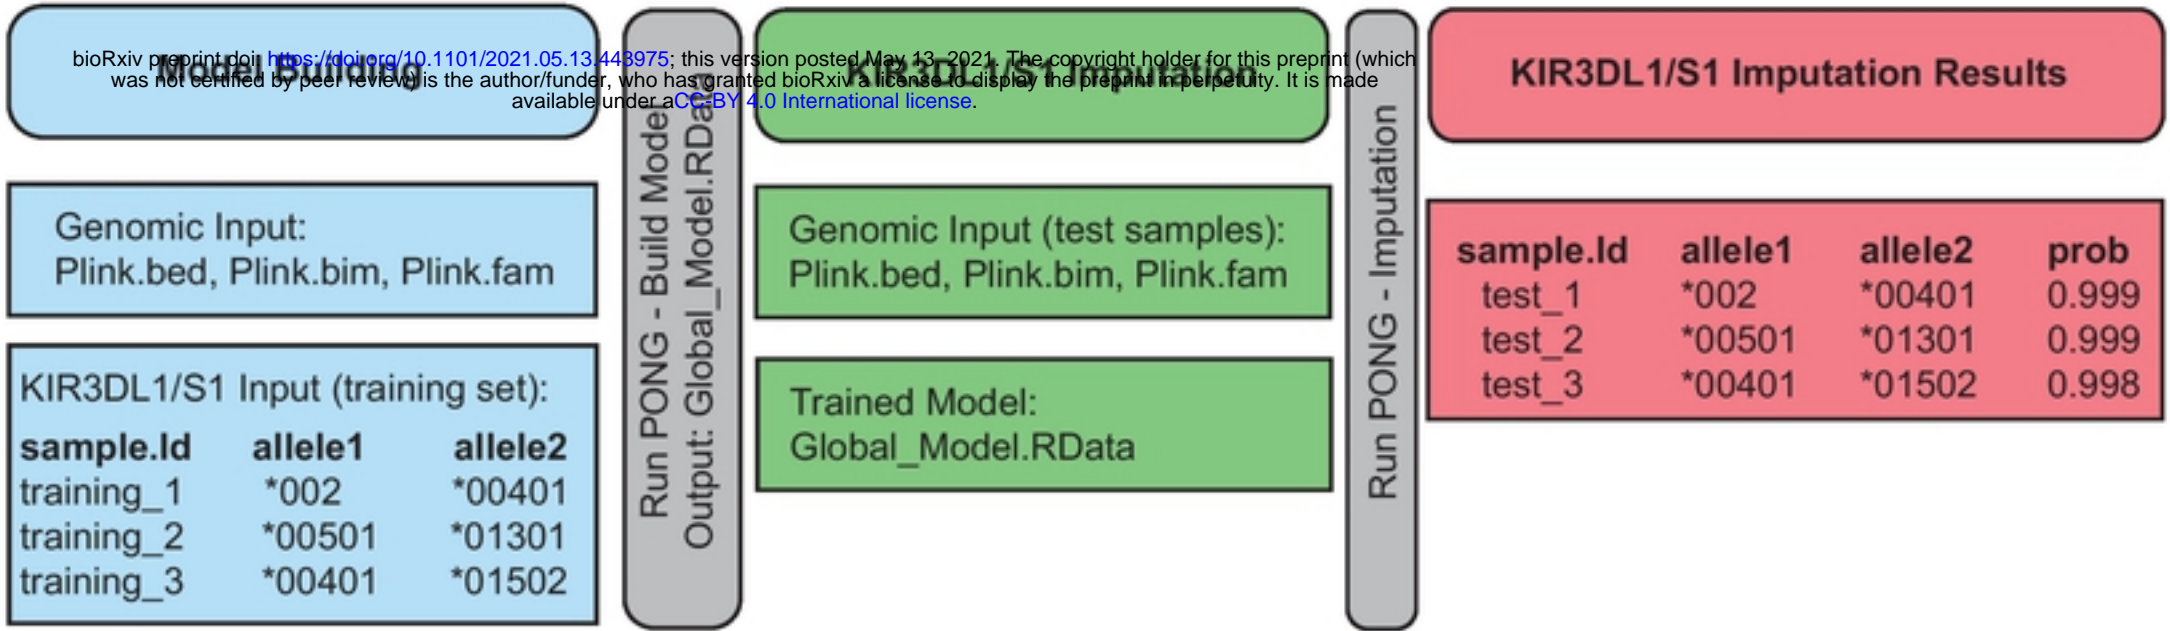

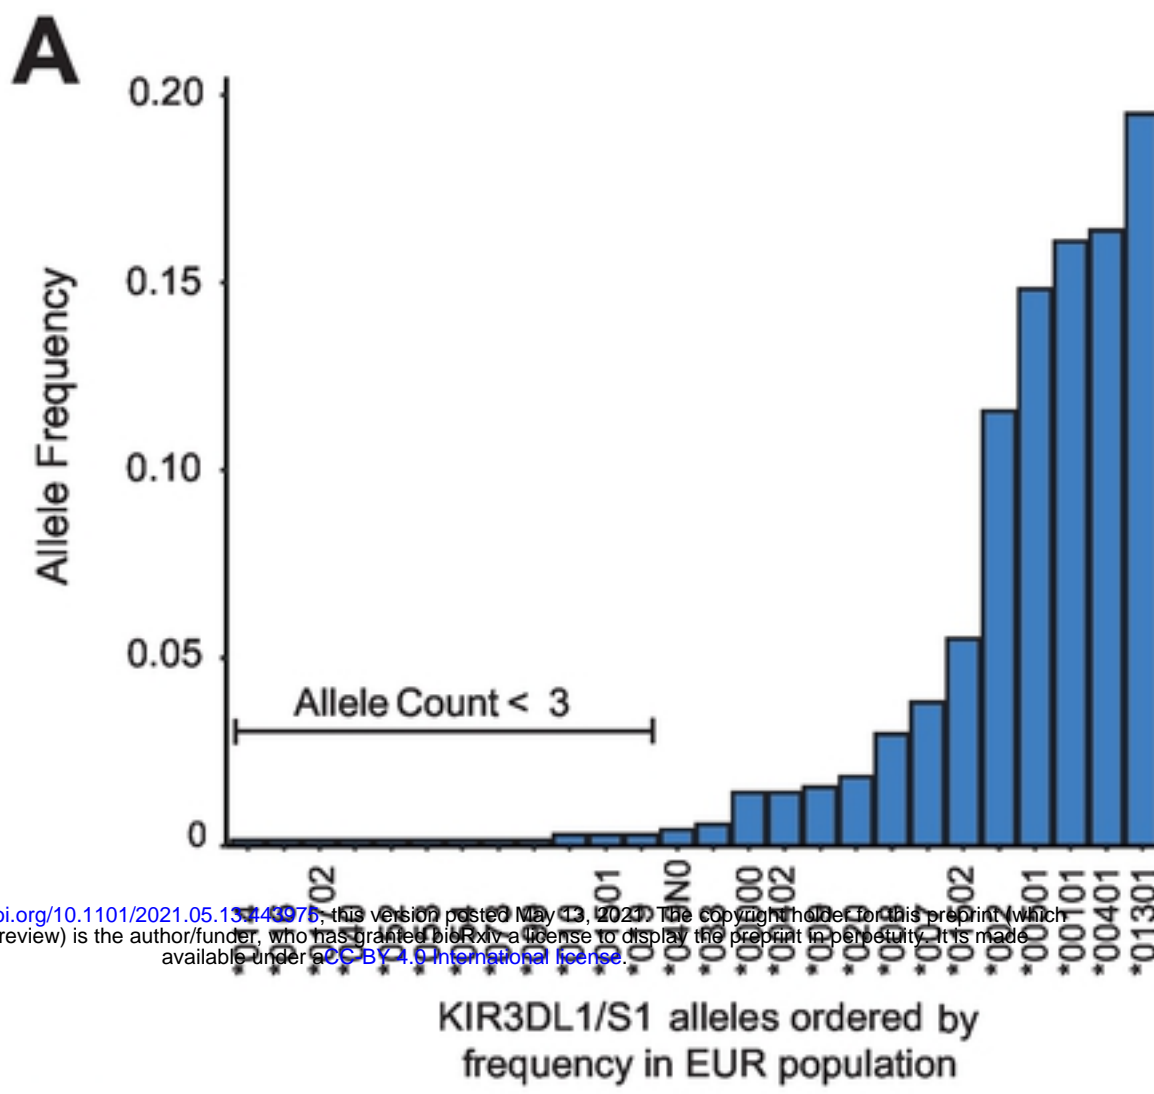

bioRxiv preprint doi: <https://doi.org/10.1101/2021.05.13.440976>; this version posted May 13, 2021. The copyright holder for this preprint (which was not certified by peer review) is the author/funder, who has granted bioRxiv a license to display the preprint in perpetuity. It is made available under aCC-BY 4.0 International license.

**B**

| Filtered           | Input Threshold | Building Time (hr : min) | Accuracy (%) |
|--------------------|-----------------|--------------------------|--------------|
| SNPs               | none            | 1:24                     | 92           |
|                    | MAC < 2         | 1:13                     | 92           |
|                    | MAC < 3         | 1:06                     | 92           |
|                    | MAF < 1%        | 1:09                     | 92           |
|                    | MAF < 5%        | 0:29                     | 91           |
| KIR3DL1/S1 alleles | MAC < 3         | 0:49                     | 96           |

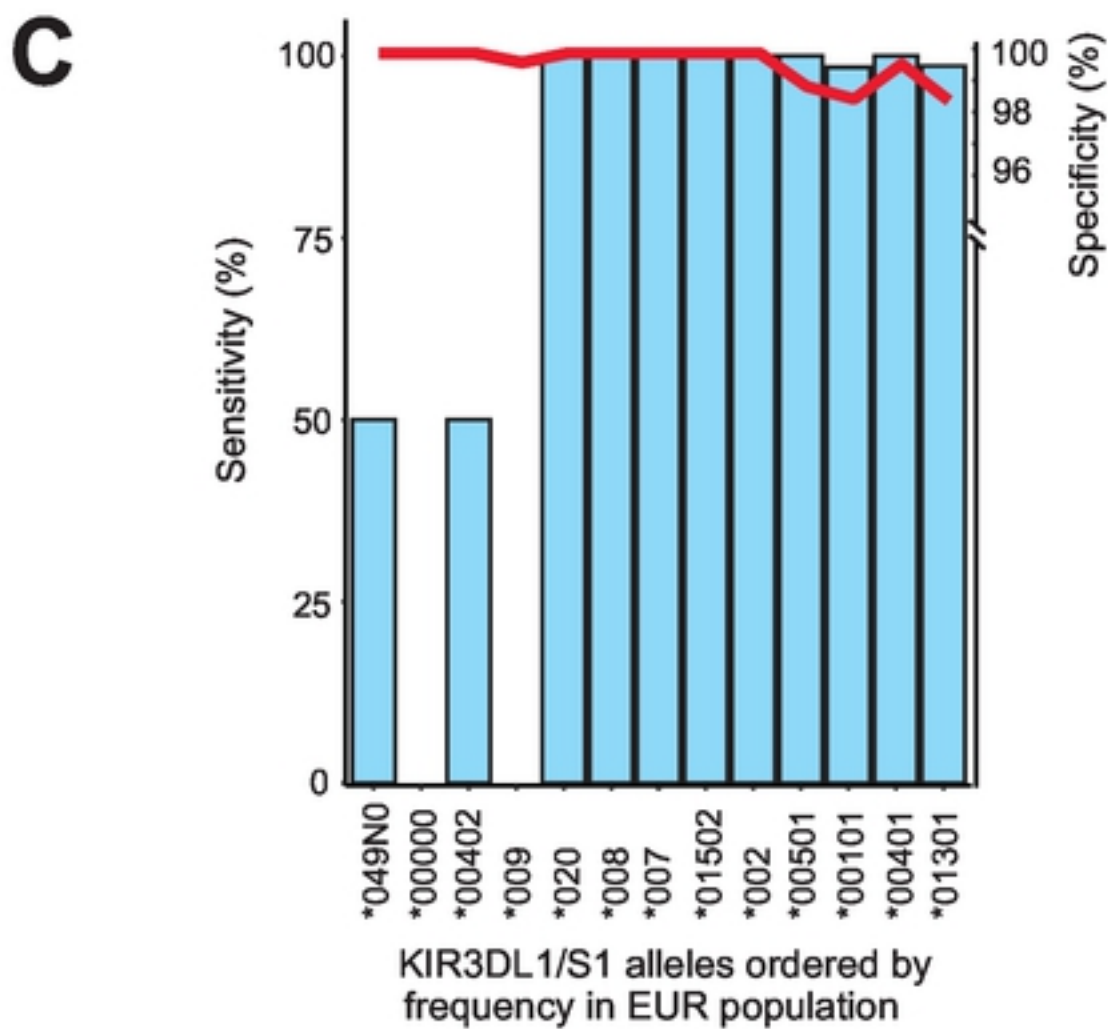

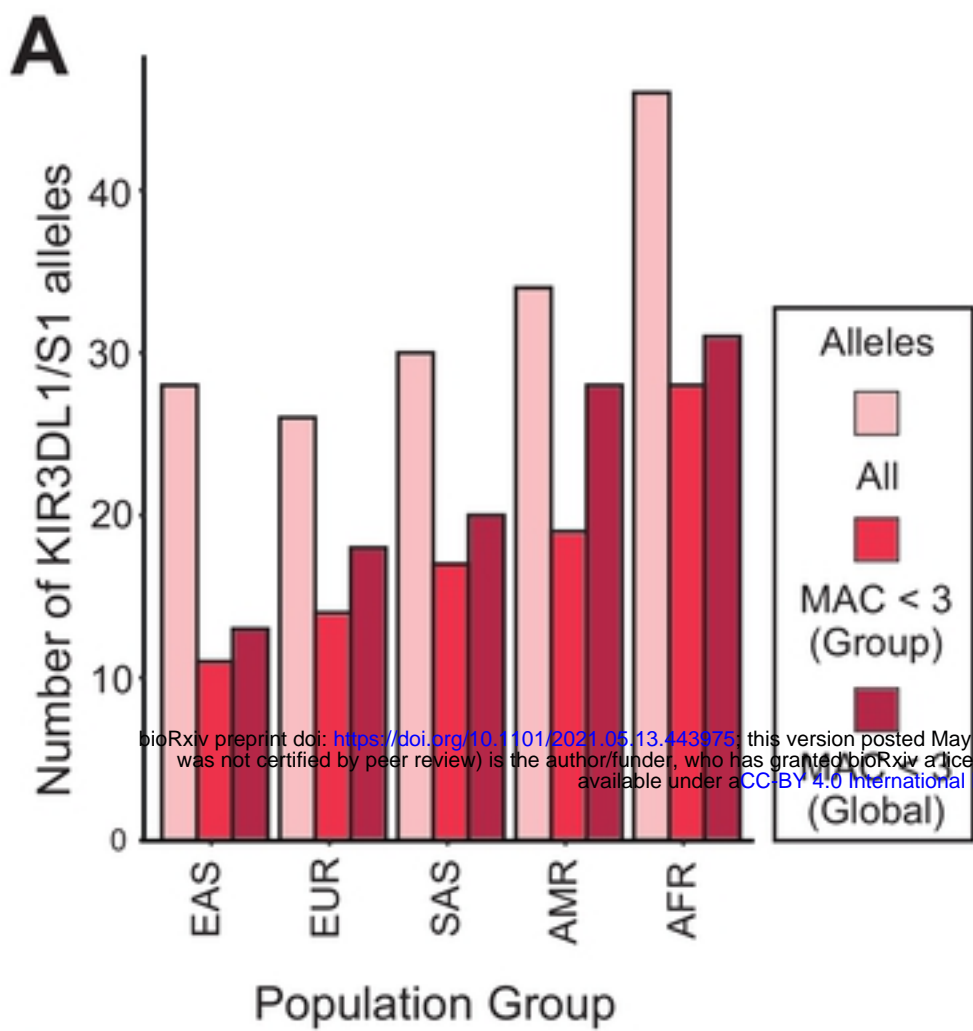

**B**

| Population Group  | Model Build (accuracy) |        |
|-------------------|------------------------|--------|
|                   | Within Group           | Global |
| African (AFR)     | 88.2%                  | 89.2%  |
| American (AMR)    | 88.6%                  | 92.5%  |
| East Asian (EAS)  | 96.6%                  | 97.2%  |
| European (EUR)    | 94.0%                  | 95.0%  |
| South Asian (SAS) | 87.8%                  | 89.0%  |
| Global            |                        | 92.3%  |

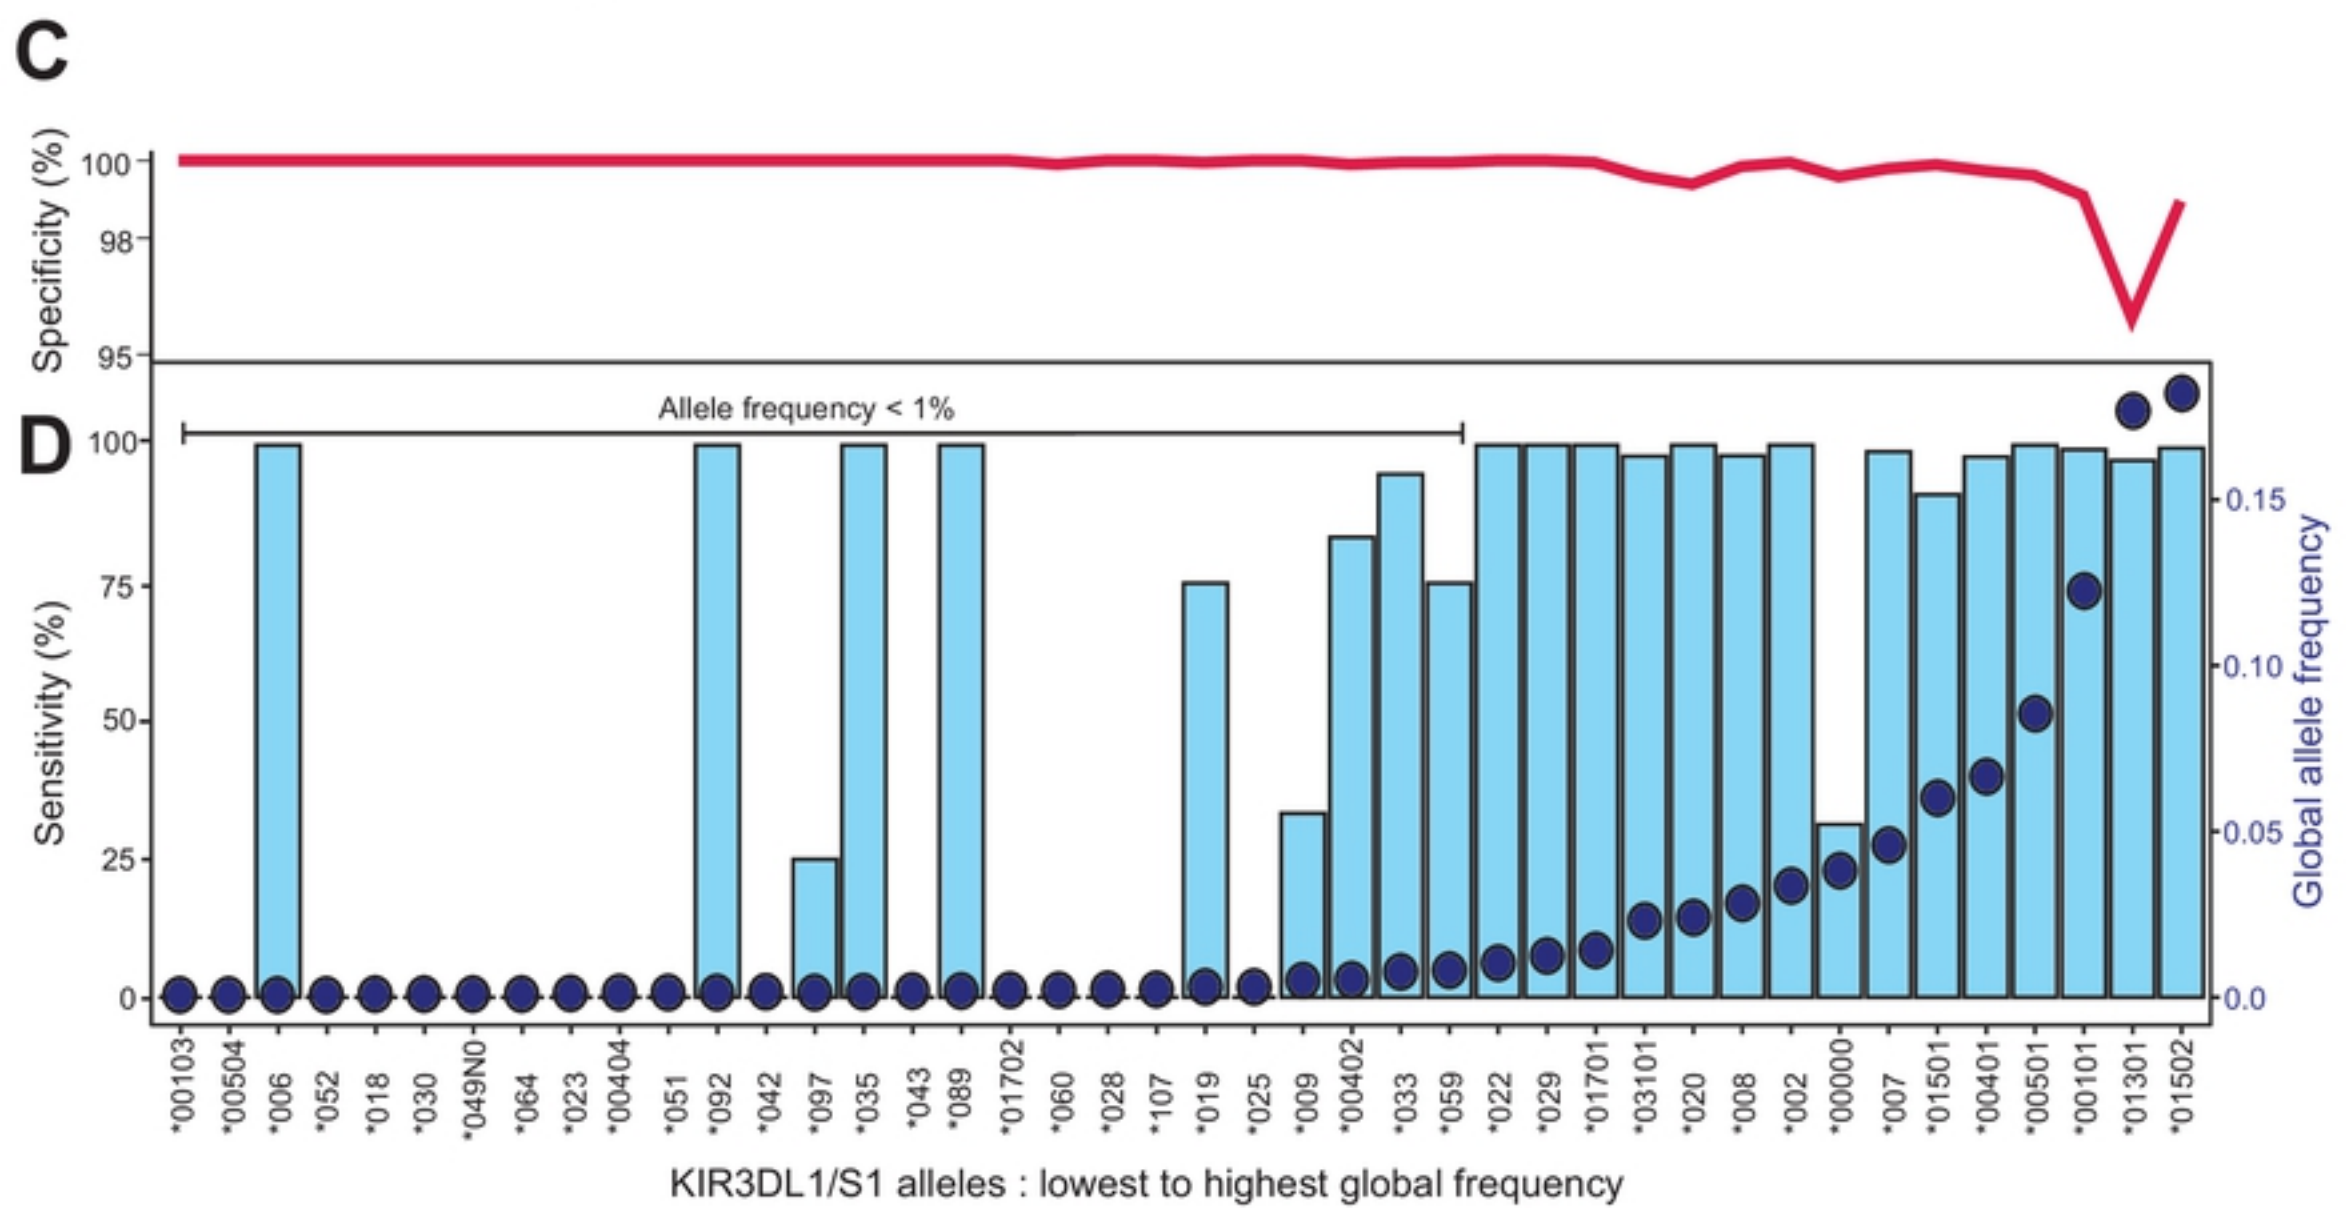

bioRxiv preprint doi: <https://doi.org/10.1101/2021.05.13.443976>; this version posted May 13, 2021. The copyright holder for this preprint (which was not certified by peer review) is the author/funder, who has granted bioRxiv a license to display the preprint in perpetuity. It is made available under aCC-BY 4.0 International license.

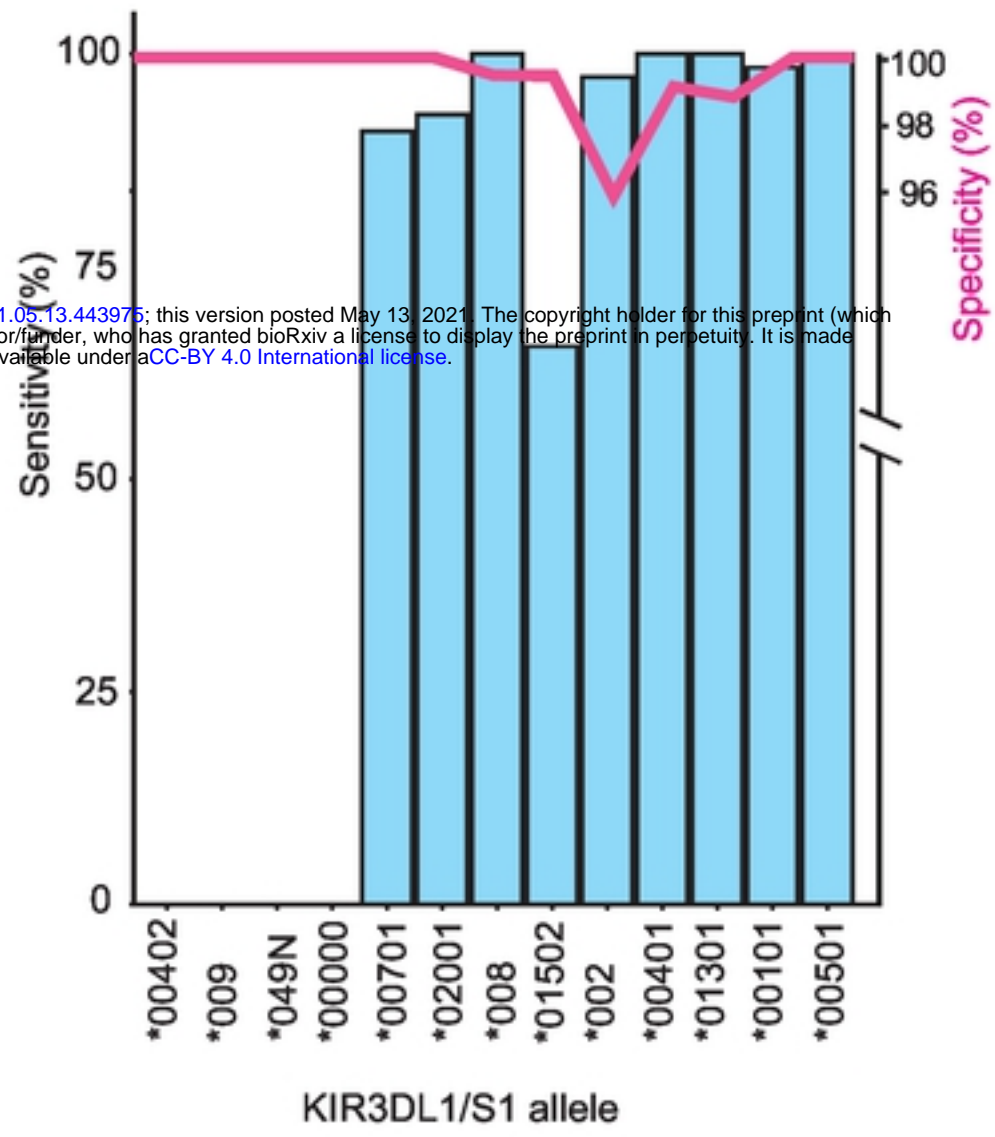

Source: https://www.biorxiv.org/content/10.1101/2021.05.13.443975v1.full.pdf
